# Supplementary material for: Effectiveness and characteristics of physical fitness training on aerobic fitness in vulnerable older adults: an umbrella review of systematic reviews
Source: HighWire-hosted journal article supplement (doi:10.1136/bmjopen-2021-058056), 2022-05-01
Supplement: bmjopen-2021-058056supp006_data_supplement.pdf [file bmjopen-2021-058056supp006_data_supplement.pdf]

## Supplementary File F. Results of AMSTAR 2 review quality assessment.

| Review                  | Item 1 | Item 2 | Item 3 | Item 4 | Item 5 | Item 6 | Item 7 | Item 8 | Item 9 RCT | Item 9 NRSI | Item 10 | Item 11 RCT | Item 11 NRSI | Item 12 | Item 13 | Item 14 | Item 15 | Item 16 |
|-------------------------|--------|--------|--------|--------|--------|--------|--------|--------|------------|-------------|---------|-------------|--------------|---------|---------|---------|---------|---------|
| Ada, 2010               | +      | -      | +      | +/-    | -      | +      | +      | +/-    | +          | NA*         | -       | +           | NA**         | +       | +       | +       | -       | -       |
| Angevaren, 2008         | +      | +      | -      | +      | +      | +      | +      | +      | +          | NA*         | -       | +           | NA**         | +       | +       | +       | +       | +       |
| Anthony, 2013           | -      | -      | -      | +/-    | -      | -      | -      | -      | +          | NA*         | -       | NA**        | NA**         | NA**    | -       | -       | NA**    | -       |
| Baker, 2007             | -      | -      | -      | -      | +      | +      | +      | +      | +          | NA*         | -       | NA**        | NA**         | NA**    | -       | +       | -       | +       |
| Blankevoort, 2010       | -      | -      | +      | -      | +      | -      | -      | +/-    | +          | +           | -       | -           | -            | -       | -       | -       | -       | +       |
| Bouaziz, 2015           | +      | -      | -      | -      | +      | -      | -      | +/-    | -          | -           | -       | NA**        | NA**         | NA**    | -       | -       | NA**    | +       |
| Bouaziz, 2016           | -      | -      | -      | -      | +      | -      | -      | -      | -          | -           | -       | NA**        | NA**         | NA**    | -       | +       | NA**    | +       |
| Bouaziz, 2018           | +      | -      | -      | -      | +      | -      | -      | +/-    | +          | NA*         | -       | +           | NA**         | -       | -       | +       | +       | +       |
| Bruns, 2016             | -      | +/-    | -      | -      | +      | +      | -      | +/-    | +          | +           | -       | NA**        | NA**         | NA**    | -       | +       | NA**    | +       |
| Bueno- de Souza, 2018   | +      | -      | -      | -      | +      | -      | -      | +      | +          | NA*         | -       | +           | NA**         | -       | +       | -       | -       | +       |
| Bullo, 2018             | +      | -      | -      | -      | +      | -      | -      | +/-    | +          | -           | -       | -           | -            | -       | -       | +       | -       | +       |
| Cugusi, 2017            | -      | -      | -      | +/-    | +      | +      | +      | +/-    | +          | NA*         | -       | +           | NA**         | -       | -       | +       | +       | -       |
| Dale, 2015              | +      | +      | -      | +      | +      | +      | +      | +      | +          | NA*         | +       | +           | NA**         | +       | +       | +       | +       | +       |
| Doyle, 2019             | +      | -      | -      | -      | +      | +      | -      | +/-    | -          | -           | -       | +           | -            | -       | -       | +       | -       | +       |
| Fukuta, 2016            | +      | -      | -      | +/-    | +      | -      | -      | +/-    | -          | NA*         | -       | +           | NA**         | -       | -       | +       | +       | +       |
| Gardner, 2014           | +      | -      | -      | -      | +      | +      | -      | +/-    | +          | +           | -       | NA**        | NA**         | NA**    | -       | +       | NA**    | +       |
| Golledge, 2019          | +      | -      | -      | +/-    | +      | +      | -      | +/-    | +          | NA*         | -       | +           | NA**         | -       | -       | -       | +       | +       |
| Gomes-Neto, 2019        | -      | -      | -      | +/-    | +      | +      | -      | -      | +          | NA*         | -       | +           | NA**         | -       | -       | +       | -       | +       |
| Halloway, 2015          | -      | -      | +      | -      | -      | +      | -      | +      | -          | NA*         | -       | NA**        | NA**         | NA**    | -       | +       | NA**    | +       |
| Hernandez, 2015         | -      | +/-    | -      | -      | +      | -      | -      | -      | -          | -           | -       | NA**        | NA**         | NA**    | -       | -       | NA**    | -       |
| Heyn, 2008              | +      | -      | -      | -      | -      | -      | -      | +/-    | -          | NA*         | -       | -           | NA**         | -       | -       | -       | -       | -       |
| Howes, 2017             | -      | +      | -      | -      | -      | +      | -      | +/-    | +          | NA*         | -       | +           | NA**         | -       | -       | +       | +       | +       |
| Huang, 2002, 2005, 2016 | +      | -      | -      | -      | -      | +      | +/-    | +/-    | -          | -           | -       | +           | -            | -       | +       | +       | +       | +       |
| Hurst, 2019             | +      | +/-    | -      | -      | +      | +      | -      | +/-    | +          | -           | -       | +           | -            | -       | -       | +       | +       | +       |
| Hwang, 2015             | -      | -      | -      | -      | -      | -      | -      | +/-    | -          | -           | -       | NA**        | NA**         | NA**    | -       | -       | NA**    | -       |
| Kanach, 2018            | +      | -      | -      | +/-    | +      | +      | -      | +/-    | +          | -           | -       | NA**        | NA**         | NA**    | -       | +       | NA**    | -       |

## Supplementary File F. Results of AMSTAR 2 review quality assessment.

| Review                 | Item 1 | Item 2 | Item 3 | Item 4 | Item 5 | Item 6 | Item 7 | Item 8 | Item 9 RCT | Item 9 NRSI | Item 10 | Item 11 RCT | Item 11 NRSI | Item 12 | Item 13 | Item 14 | Item 15 | Item 16 |
|------------------------|--------|--------|--------|--------|--------|--------|--------|--------|------------|-------------|---------|-------------|--------------|---------|---------|---------|---------|---------|
| Keogh, 2012            | -      | -      | -      | +/-    | -      | -      | -      | -      | -          | -           | -       | NA**        | NA**         | NA**    | -       | -       | NA**    | +       |
| Kuijlaars, 2019        | +      | +/-    | -      | +/-    | +      | +      | -      | +      | +          | NA*         | -       | +           | NA**         | -       | -       | +       | -       | +       |
| Lam, 2018              | +      | -      | -      | -      | +      | -      | -      | +      | +          | NA*         | -       | +           | NA**         | +       | +       | +       | +       | +       |
| Lee, 2017              | +      | +/-    | -      | +/-    | +      | +      | -      | +      | +          | NA*         | -       | +           | NA**         | +       | -       | +       | -       | +       |
| Leggio, 2019           | +      | -      | -      | -      | +      | -      | -      | -      | +          | NA*         | -       | NA**        | NA**         | NA**    | -       | +       | NA**    | +       |
| Li, 2019               | +      | -      | -      | -      | +      | -      | -      | +/-    | +          | NA*         | -       | +           | NA**         | +       | +       | +       | -       | +       |
| Liao, 2015             | +      | -      | -      | -      | -      | +      | -      | +/-    | +/-        | NA*         | -       | +           | NA**         | -       | -       | +       | -       | +       |
| Paneroni, 2017         | +      | -      | -      | +/-    | +      | +      | -      | +      | +          | NA*         | -       | +           | NA**         | -       | -       | +       | +       | +       |
| Parmenter, 2013        | +      | -      | -      | +/-    | -      | -      | -      | +/-    | +          | NA*         | -       | NA**        | NA**         | NA**    | -       | +       | NA**    | +       |
| Patel, 2012            | +      | -      | -      | -      | +      | +      | -      | +      | -          | NA*         | +       | +           | NA**         | -       | -       | -       | -       | +       |
| Pengelly, 2019         | +      | +/-    | -      | -      | -      | +      | -      | +/-    | +/-        | +           | -       | +           | -            | -       | -       | +       | -       | +       |
| Puhan, 2016            | +      | +      | -      | +      | +      | +      | +      | +      | +          | NA*         | +       | +           | NA**         | +       | +       | +       | +       | +       |
| Rezende Barbosa, 2018  | -      | +/-    | -      | +/-    | -      | +      | -      | -      | +          | NA*         | -       | +           | NA**         | +       | +       | -       | +       | +       |
| Ribeiro, 2017          | +      | +/-    | -      | -      | +      | +      | -      | -      | +          | -           | -       | -           | -            | -       | -       | +       | +       | +       |
| Rodrigues-Krause, 2016 | +      | +/-    | +      | -      | +      | +      | -      | +/-    | +          | +           | -       | +           | -            | -       | -       | +       | +       | +       |
| Rodrigues-Krause, 2019 | +      | -      | +      | -      | -      | -      | -      | +      | +          | -           | -       | NA**        | NA**         | NA**    | -       | -       | NA**    | +       |
| Rosero, 2019           | +      | -      | -      | -      | +      | +      | +      | +/-    | +          | NA*         | -       | +           | NA**         | -       | -       | +       | +       | +       |
| Rydwik, 2004           | +      | -      | -      | -      | -      | -      | -      | +/-    | +          | NA*         | -       | NA**        | NA**         | NA**    | +       | +       | NA**    | -       |
| Ryrso, 2018            | +      | -      | -      | -      | +      | +      | -      | +      | +          | NA*         | -       | +           | NA**         | +       | +       | +       | -       | +       |
| Scheerman, 2018        | +      | -      | -      | -      | +      | +      | -      | +/-    | +          | NA*         | -       | NA**        | NA**         | NA**    | +       | +       | NA**    | +       |
| Slimani, 2018          | +      | -      | -      | +/-    | -      | +      | -      | -      | -          | NA*         | -       | +           | NA**         | -       | -       | +       | +       | +       |
| Vieira, 2010           | +      | -      | -      | -      | -      | +      | -      | +      | +          | NA*         | -       | NA**        | NA**         | NA**    | -       | -       | NA**    | +       |
| Wee, 2019              | +      | +      | -      | +/-    | +      | +      | -      | +/-    | +/-        | -           | -       | NA**        | NA**         | NA**    | -       | -       | NA**    | +       |

Appendix 5 Results of AMSTAR 2 review quality assessment.

## Supplementary File F. Results of AMSTAR 2 review quality assessment.

Legend: *RCT*: randomized controlled trials; *NRSI*: non-randomized studies of interventions; “+”: yes; “-”: no; “+/-”: partial yes; *NA\**: Includes only RCT’s; *NA\*\**: No meta-analysis conducted

*Item 1* Did the research questions and inclusion criteria for the review include the components of **PICO**?; *Item 2* Did the report of the review contain an explicit statement that the **review methods were established prior to** conduct of the review and did the report justify any significant deviations from the protocol?; *Item 3* Did the review authors **explain their selection of the study designs** for inclusion in the review?; *Item 4* Did the review authors use a **comprehensive literature search strategy**?; *Item 5* Did the review authors perform **study selection in duplicate**?; *Item 6* Did the review authors perform **data extraction in duplicate**?; *Item 7* Did the review authors provide **a list of excluded studies** and justify the exclusions?; *Item 8* Did the review authors **describe the included studies in adequate detail**?; *Item 9* Did the review authors use a **satisfactory technique for assessing the risk of bias (RoB)** in individual studies that were included in the review?; *Item 10* Did the review authors **report on the sources of funding** for the studies included in the review?; *Item 11* If meta-analysis was justified did the review authors use **appropriate methods** for statistical combination of results? (Only complete this item if meta-analysis of other data synthesis techniques were reported); *Item 12* If meta-analysis was performed did the review authors **assess the potential impact of RoB** in individual studies on the results of the meta-analysis or other evidence synthesis?; *Item 13* Did the review authors **account for RoB in individual studies when interpreting/ discussing the results** of the review?; *Item 14* Did the review authors provide a satisfactory **explanation for, and discussion of, any heterogeneity observed** in the results of the review?; *Item 15* If they performed quantitative synthesis did the review authors carry out an adequate **investigation of publication bias** (small study bias) and discuss its likely impact on the results of the review?; *Item 16* Did the review authors report any **potential sources of conflict of interest**, including any funding they received for conducting the review?;
